# Supplementary material
Source: PubMed Central journal article supplement (PMC2964402)
Supplement: NIHMS243375-supplement-1_si_001.pdf [file NIHMS243375-supplement-1_si_001.pdf]

**Thermodynamic stability and folding kinetics of the major G-quadruplex and its loop-isomers  
formed in the Nuclease Hypersensitive Element in the human c-Myc promoter  
-Effect of loops and flanking segments on the stability of parallel-stranded intramolecular G-  
quadruplexes**

Emmanuel Hatzakis<sup>‡</sup>, Keika Okamoto<sup>‡</sup>, Danzhou Yang<sup>‡§||†\*</sup>

**SUPPORTING INFORMATION**

TITLE RUNNING HEAD: Stability and kinetics of c-Myc promoter G4 loop-isomers

**Table S1.**  $\Delta G_{25}$  values for the c-Myc G-quadruplex loop-isomers formed by the extended and truncated DNA sequences, determined in the presence of 10 mM  $\text{Li}_3\text{PO}_4$  (pH=7) containing different concentrations of  $\text{K}^+$ . The same experiment conditions as described for Table 2 were used.

|                          | $\Delta G_{25}$<br>(kJ/mol) | $\Delta G_{25}$<br>(kJ/mol) | $\Delta G_{25}$<br>(kJ/mol) | $\Delta G_{25}$<br>(kJ/mol) |
|--------------------------|-----------------------------|-----------------------------|-----------------------------|-----------------------------|
| <b>DNA\[\text{K}^+\]</b> | <b>2mM</b>                  | <b>5mM</b>                  | <b>10mM</b>                 | <b>20mM</b>                 |
| 14/23                    | -14.8                       | -20.08                      | -23.58                      | -29.98                      |
| 11/23                    | -12.59                      | -15.03                      | -19.84                      | -25.43                      |
| 14/20                    | -11.40                      | -15.00                      | -16.86                      | -22.93                      |
| 11/20                    | -7.12                       | -9.16                       | -11.80                      | -16.98                      |
| T14/23T                  | -16.20                      | -19.40                      | -20.62                      | -24.72                      |
| T11/23T                  | -13.19                      | -17.35                      | -18.87                      | -24.16                      |
| T14/20T                  | -11.71                      | -16.19                      | -19.28                      | -21.45                      |
| T11/20T                  | -8.70                       | -13.70                      | -16.11                      | -19.19                      |

### Figure legends

**Figure S1.** Hysteresis was observed between CD melting (black) and annealing (red) curves of 11/20 with a temperature gradient of 0.5 °C/min. The presence of hysteresis between melting and annealing profiles indicates the molecule is not at thermodynamic equilibrium during melting and annealing processes. Conditions: 10 mM Li<sub>3</sub>PO<sub>4</sub> (pH=7), 2 mM [K<sup>+</sup>].

**Figure S2.** The imino regions of 1D <sup>1</sup>H NMR spectra of the completely truncated sequences for the four loop-isomers of the major c-Myc G-quadruplex. The DNA sequences of 14/23TR, 11/23TR, 14/20TR, 11/20TR are shown at the bottom. The completely truncated sequences did not show good quality <sup>1</sup>H NMR spectra. Experimental conditions: 25°C, 30 mM K<sup>+</sup>-phosphate, 70 mM KCl, pH 7.0, 0.2 mM DNA.

**Figure S3.** The CD melting (red) and annealing (black) curves of 11/20 and 11/23 loop-isomers with different temperature gradients. Hysteresis between the melting and annealing curves were observed for 11/20 (A) and 11/23 (B) with temperature gradients of 2 °C/min (upper) and 4 °C/min (lower). A higher level of hysteresis was observed for 11/20 as compared to 11/23. Conditions: 10 mM Li<sub>3</sub>PO<sub>4</sub> (pH=7), 2 mM [K<sup>+</sup>].

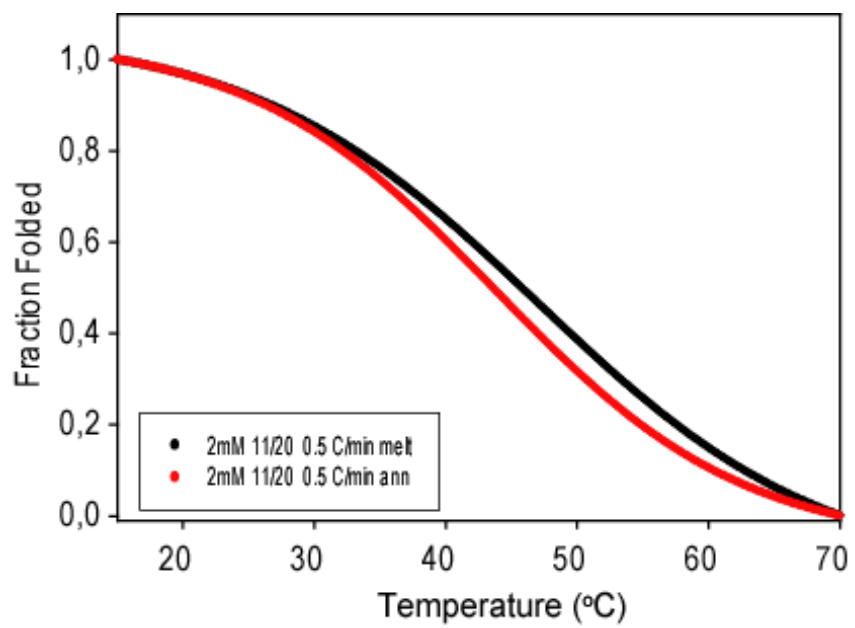

Figure S1.

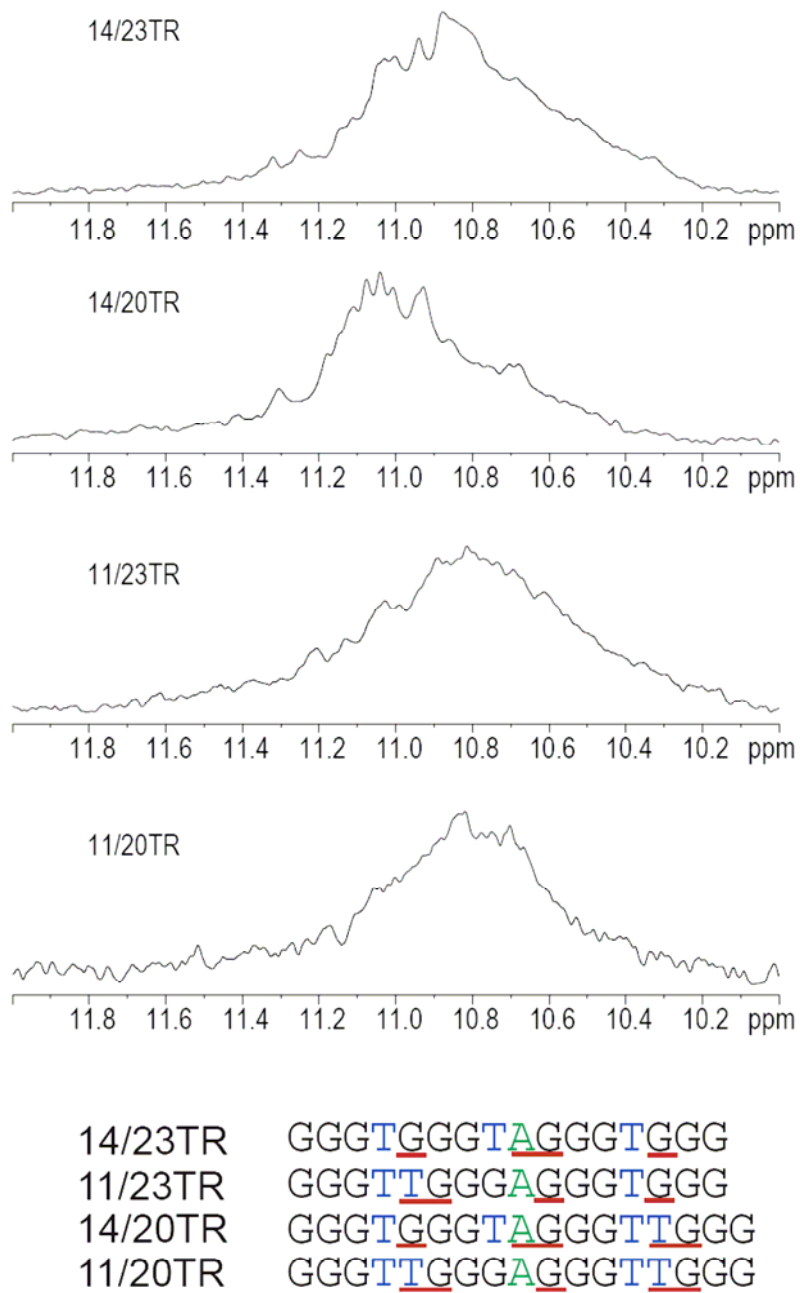

Figure S2.

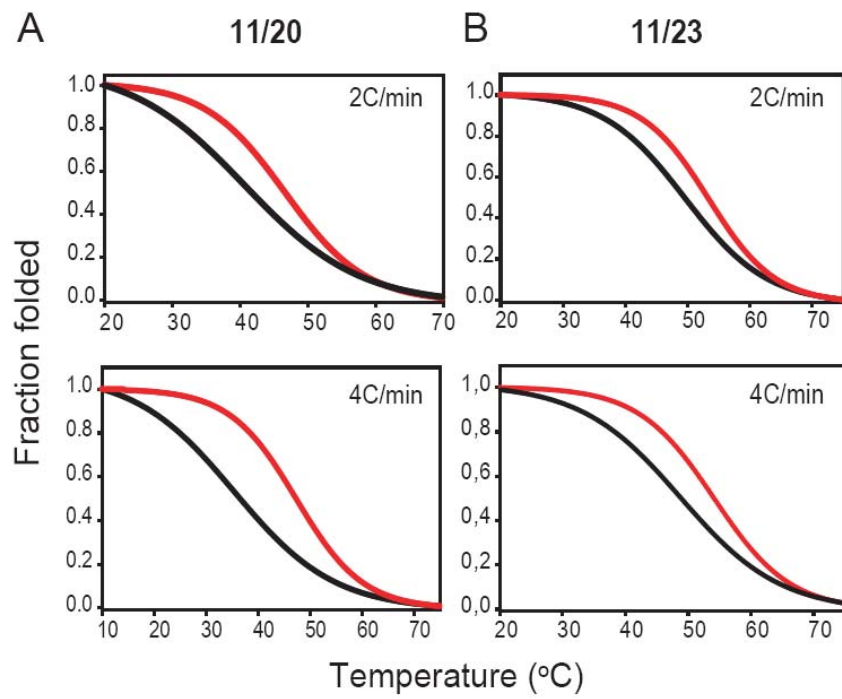

Figure S3.
